# Supplementary material for: The Broad-Spectrum Antimicrobial Potential of [Mn(CO)4(S2CNMe(CH2CO2H))], a Water-Soluble CO-Releasing Molecule (CORM-401): Intracellular Accumulation, Transcriptomic and Statistical Analyses, and Membrane Polarization
Source: PubMed Central journal article supplement (PMC5905950; doi:10.1089/ars.2017.7239), 2018-05-10
Supplement: Supp_Data.pdf [file Supp_Data.pdf]

## Supplementary Data

SUPPLEMENTARY TABLE S1. LIST OF THE THIRTY MOST HIGHLY REGULATED GENES, BOTH AEROBICALLY AND ANAEROBICALLY

|         |              | Time (min, after CORM-401 addition) |       |       |       |       |       |
|---------|--------------|-------------------------------------|-------|-------|-------|-------|-------|
| Gene    |              | 2.5                                 | 5     | 10    | 20    | 40    | 80    |
| Aerobic | <i>spy</i>   | 34.3                                | 124.4 | 357.1 | 330.3 | 420.8 | 250.2 |
|         | <i>uhpT</i>  | 3.3                                 | 18.0  | 76.2  | 124.2 | 216.7 | 142.8 |
|         | <i>mdtA</i>  | 12.4                                | 29.6  | 46.3  | 63.2  | 41.8  | 17.1  |
|         | <i>baeS</i>  | 1.4                                 | 2.3   | 25.1  | 45.4  | 67.4  | 19.7  |
|         | <i>mdtB</i>  | 4.4                                 | 24.3  | 32.6  | 42.5  | 30.2  | 10.8  |
|         | <i>kdpC</i>  | 0.4                                 | 1.5   | 32.8  | 33.8  | 18.2  | 5.5   |
|         | <i>yhdV</i>  | 3.1                                 | 5.5   | 7.9   | 29.0  | 12.5  | 5.7   |
|         | <i>yebE</i>  | 6.6                                 | 20.7  | 39.8  | 28.9  | 19.7  | 9.4   |
|         | <i>kdpF</i>  | 0.9                                 | 6.2   | 20.8  | 28.0  | 1.8   | 2.0   |
|         | <i>mdtC</i>  | 1.0                                 | 9.8   | 24.7  | 22.5  | 24.2  | 8.6   |
|         | <i>kdpA</i>  | 0.9                                 | 2.9   | 11.3  | 15.6  | 1.5   | 1.5   |
|         | <i>kdpB</i>  | 0.7                                 | 1.3   | 9.8   | 13.8  | 7.5   | 4.8   |
|         | <i>ycfS</i>  | 3.4                                 | 10.6  | 19.9  | 13.6  | 9.8   | 5.1   |
|         | <i>cpxP</i>  | 12.3                                | 17.2  | 17.7  | 13.6  | 16.8  | 10.6  |
|         | <i>b3914</i> | 9.6                                 | 17.4  | 18.0  | 13.4  | 15.1  | 10.3  |
|         | <i>cpxP</i>  | 9.7                                 | 17.7  | 18.4  | 12.6  | 16.1  | 10.6  |
|         | <i>ybfA</i>  | 2.9                                 | 5.1   | 6.1   | 11.8  | 7.4   | 3.0   |
|         | <i>htpX</i>  | 5.1                                 | 9.2   | 12.7  | 11.7  | 11.7  | 7.4   |
|         | <i>znuA</i>  | 1.0                                 | 2.6   | 6.5   | 11.2  | 10.0  | 5.2   |
|         | <i>acrD</i>  | 4.8                                 | 10.7  | 15.2  | 11.2  | 10.9  | 6.9   |
|         | <i>chaA</i>  | 2.2                                 | 7.0   | 14.4  | 9.8   | 5.8   | 4.1   |
|         | <i>ybdZ</i>  | 1.6                                 | 4.1   | 4.1   | 9.3   | 2.8   | 2.1   |
|         | <i>metF</i>  | 0.9                                 | 0.0   | 2.4   | 9.0   | 3.7   | 1.0   |
|         | <i>yobB</i>  | 4.7                                 | 9.1   | 11.9  | 8.4   | 6.4   | 4.9   |
|         | <i>ybdZ</i>  | 1.7                                 | 3.8   | 3.5   | 8.3   | 2.0   | 2.0   |
|         | <i>yaaX</i>  | 2.9                                 | 4.2   | 7.5   | 8.3   | 6.3   | 3.3   |
|         | <i>glvC</i>  | 0.5                                 | 1.0   | 1.0   | 7.9   | 1.3   | 3.3   |
|         | <i>entA</i>  | 0.8                                 | 1.8   | 5.3   | 7.8   | 4.7   | 1.8   |
|         | <i>degP</i>  | 2.2                                 | 1.2   | 1.9   | 7.5   | 7.4   | 4.1   |
|         | <i>yedX</i>  | 2.2                                 | 6.0   | 4.3   | 7.4   | 5.0   | 4.2   |

  

|           |              | Time (min, after CORM-401 addition) |       |       |       |       |       |
|-----------|--------------|-------------------------------------|-------|-------|-------|-------|-------|
| Gene      |              | 2.5                                 | 5     | 10    | 20    | 40    | 80    |
| Anaerobic | <i>spy</i>   | 14.3                                | 200.4 | 585.0 | 505.5 | 672.6 | 556.4 |
|           | <i>uhpT</i>  | 1.1                                 | 8.3   | 89.5  | 112.6 | 112.1 | 106.3 |
|           | <i>mdtA</i>  | 12.4                                | 35.2  | 63.0  | 59.9  | 60.2  | 39.3  |
|           | <i>baeS</i>  | 0.9                                 | 1.1   | 31.0  | 38.9  | 25.2  | 14.3  |
|           | <i>yebE</i>  | 2.4                                 | 17.2  | 39.1  | 32.0  | 28.0  | 11.6  |
|           | <i>mdtC</i>  | 1.0                                 | 7.9   | 22.4  | 29.8  | 21.5  | 17.0  |
|           | <i>marA</i>  | 3.6                                 | 11.4  | 16.7  | 28.6  | 47.8  | 20.4  |
|           | <i>mdtB</i>  | 1.1                                 | 10.4  | 24.8  | 23.0  | 20.8  | 18.4  |
|           | <i>marB</i>  | 3.3                                 | 5.6   | 13.9  | 21.7  | 26.7  | 10.3  |
|           | <i>ycfS</i>  | 2.1                                 | 25.7  | 42.2  | 20.1  | 20.7  | 6.1   |
|           | <i>degP</i>  | 0.8                                 | 2.0   | 18.9  | 18.5  | 23.9  | 12.0  |
|           | <i>htpX</i>  | 2.4                                 | 10.5  | 16.1  | 14.5  | 12.5  | 7.6   |
|           | <i>ykgM</i>  | 1.5                                 | 1.2   | 2.5   | 14.3  | 43.3  | 40.9  |
|           | <i>metB</i>  | 1.4                                 | 1.1   | 5.6   | 13.0  | 2.6   | 0.8   |
|           | <i>cpxP</i>  | 4.6                                 | 11.9  | 17.0  | 12.9  | 11.5  | 5.9   |
|           | <i>b3914</i> | 4.1                                 | 11.9  | 17.1  | 12.4  | 11.5  | 5.9   |
|           | <i>cpxP</i>  | 4.7                                 | 11.4  | 13.0  | 11.7  | 11.3  | 6.5   |
|           | <i>acrD</i>  | 1.9                                 | 8.9   | 11.3  | 11.1  | 8.2   | 7.6   |
|           | <i>marR</i>  | 1.8                                 | 5.1   | 8.3   | 10.9  | 20.2  | 10.8  |
|           | <i>metF</i>  | 2.0                                 | 1.2   | 5.9   | 9.8   | 1.5   | 0.7   |
|           | <i>yjfN</i>  | 0.6                                 | 5.9   | 8.2   | 9.6   | 9.2   | 2.1   |
|           | <i>chaA</i>  | 2.2                                 | 6.4   | 12.1  | 9.5   | 11.7  | 4.2   |
|           | <i>yhdV</i>  | 1.3                                 | 1.9   | 5.6   | 9.2   | 9.1   | 12.8  |
|           | <i>sdaA</i>  | 1.4                                 | 4.1   | 9.1   | 9.2   | 18.2  | 6.7   |
|           | <i>yodA</i>  | 0.8                                 | 1.9   | 3.9   | 9.2   | 34.6  | 15.3  |
|           | <i>mmuP</i>  | 1.4                                 | 1.3   | 3.5   | 8.5   | 1.8   | 1.3   |
|           | <i>metE</i>  | 1.4                                 | 1.1   | 1.9   | 8.1   | 2.1   | 0.5   |
|           | <i>kdpC</i>  | 2.8                                 | 1.4   | 1.3   | 8.0   | 4.6   | 2.8   |
|           | <i>frmB</i>  | 1.4                                 | 1.5   | 3.1   | 7.9   | 17.8  | 9.7   |
|           | <i>yobB</i>  | 3.1                                 | 8.2   | 9.6   | 7.9   | 6.2   | 4.0   |

Values shown are fold changes relative to the pre-CORM culture sampled at the time points shown.

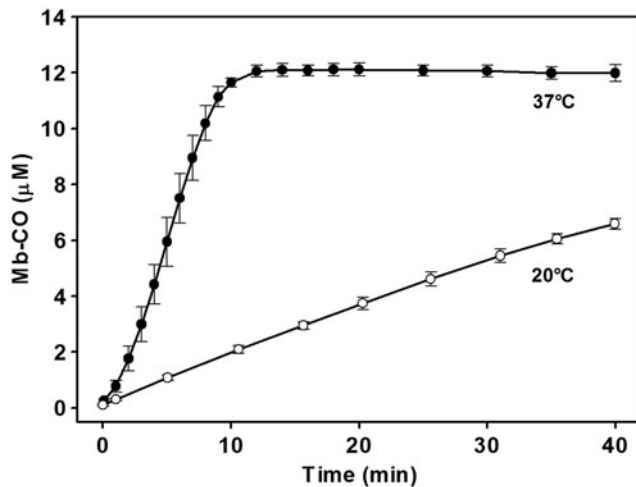

**SUPPLEMENTARY FIG. S1. CO release from CORM-401 in 0.1 M KPi (pH 7.4) at 37°C or 20°C.** Assays were performed in the presence of excess dithionite with myoglobin (20  $\mu$ M) and 5  $\mu$ M CORM-401. Under these conditions, CORM-401 releases 2.4 mole equivalent of CO with a  $t_{1/2}$  of 5 min.  $n = 3 \pm \text{SEM}$ .

---

**SUPPLEMENTARY FIG. S2. TFInfer correlation profiles (coherence plots) showing TFs involved in the response to CORM-401 versus CO gas in *E. coli* cells.** The  $x$ -coordinate of each point is presented with error bars and represents the profile difference between CORM-401 and CO treatments, computed as 1 minus the absolute Pearson correlation coefficient between the two profiles; the  $y$ -coordinate represents the change in magnitude of the response, computed as the difference of the norm of the two profiles. Data from aerobic (**A**, top) and anaerobic (**B**, bottom) conditions are shown. TFs whose response is similar for both CORM-401 and CO gas, both in magnitude and kinetics, will be located near the origin of each coherence plot in quadrant c, while TFs in quadrant b of each plot respond differently in both kinetics and amplitude. For example, CpxR, both aerobically and anaerobically, has a similar response in terms of the shape of the profile, but different magnitudes in (**A**) and (**B**), while ArcA (**A**) and ArgR (**B**) show similar magnitudes, but major differences in response profiles. TF, transcription factor.

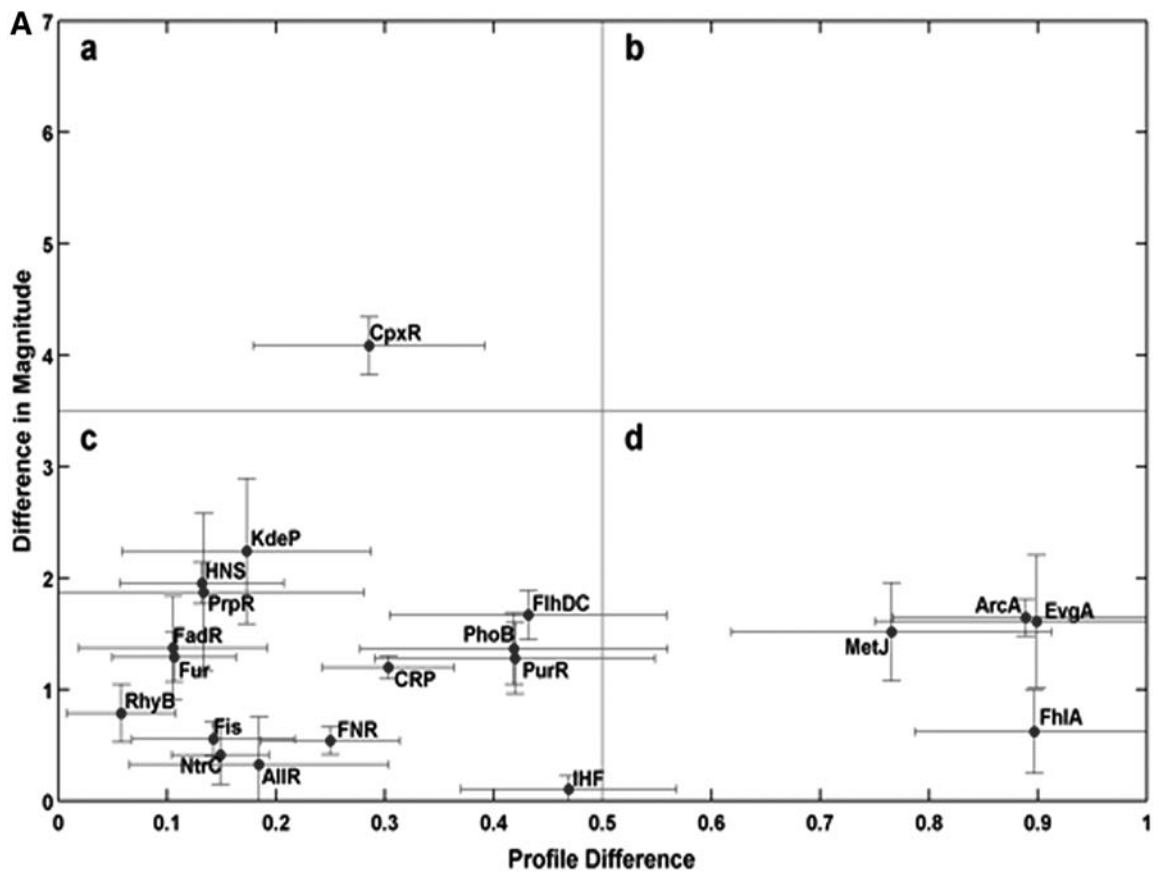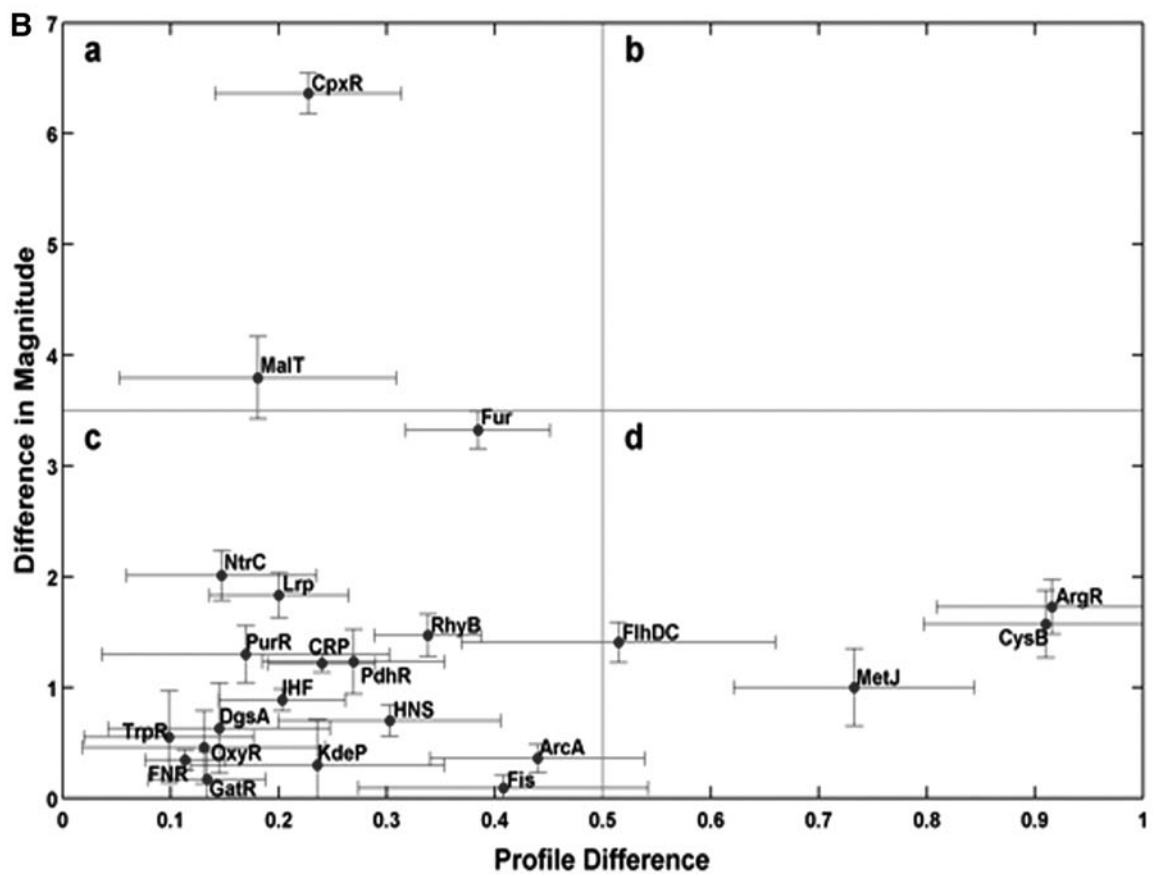

**A**

| Gene        | Function                                           | Relevant regulatory proteins | Fold change down-regulated |       |       |      |      |      | Fold change up-regulated |      |       |       |      |
|-------------|----------------------------------------------------|------------------------------|----------------------------|-------|-------|------|------|------|--------------------------|------|-------|-------|------|
|             |                                                    |                              | 30+                        | 20-30 | 10-20 | 5-10 | 2-5  | 0.0  | 2-5                      | 5-10 | 10-20 | 20-30 | 30+  |
|             |                                                    |                              | CORM-401 AEROBIC           |       |       |      |      |      | CORM-401 ANAEROBIC       |      |       |       |      |
| Time        |                                                    |                              |                            |       |       | Time |      |      |                          |      |       |       |      |
| 2.5         | 5.0                                                | 10.0                         | 20.0                       | 40.0  | 80.0  | 2.5  | 5.0  | 10.0 | 20.0                     | 40.0 | 80.0  |       |      |
| <i>cyoA</i> | cytochrome <i>bo'</i> terminal oxidase subunit II  | ArcA (-)                     |                            |       | 0.44  | 0.20 |      | 0.44 | 0.11                     | 0.09 | 0.20  |       |      |
| <i>cyoB</i> | cytochrome <i>bo'</i> terminal oxidase subunit I   | ArcA (-)                     |                            |       |       | 0.23 |      | 0.50 | 0.33                     | 0.32 | 0.38  |       |      |
| <i>cyoC</i> | cytochrome <i>bo'</i> terminal oxidase subunit III | ArcA (-)                     |                            |       |       | 0.20 |      |      | 0.22                     | 0.26 | 0.34  |       |      |
| <i>cyoD</i> | cytochrome <i>bo'</i> terminal oxidase subunit IV  | ArcA (-)                     |                            |       |       | 0.20 |      |      | 0.23                     | 0.21 | 0.26  | 0.48  |      |
| <i>cyoE</i> | heme <i>o</i> synthase                             | ArcA (-)                     |                            |       |       | 0.21 |      |      | 0.33                     | 0.36 | 0.37  | 0.48  |      |
| <i>cydA</i> | cytochrome <i>bd-I</i> terminal oxidase subunit I  | ArcA (+), FNR (-)            | 2.88                       | 2.42  |       | 2.86 | 3.07 | 2.01 |                          | 0.32 | 0.26  | 0.25  | 0.38 |
| <i>cydB</i> | cytochrome <i>bd-I</i> terminal oxidase subunit II | ArcA (+), FNR (-)            | 2.54                       | 2.37  | 2.07  | 2.83 | 2.70 |      |                          | 0.42 | 0.30  | 0.22  | 0.39 |
| <i>nuoA</i> | NADH:ubiquinone oxidoreductase I                   | ArcA (-), FNR (-)            |                            | 0.49  |       | 0.43 |      |      |                          | 0.39 | 0.29  | 0.27  | 0.39 |
| <i>nuoB</i> | NADH:ubiquinone oxidoreductase I                   | ArcA (-), FNR (-)            |                            |       |       |      |      |      |                          |      | 0.43  | 0.39  |      |
| <i>nuoC</i> | NADH:ubiquinone oxidoreductase I                   | ArcA (-), FNR (-)            |                            |       |       | 0.49 |      |      |                          | 0.46 | 0.33  | 0.35  |      |
| <i>nuoE</i> | NADH:ubiquinone oxidoreductase I                   | ArcA (-), FNR (-)            |                            |       |       | 0.44 |      |      |                          | 0.45 | 0.33  | 0.34  |      |
| <i>nuoF</i> | NADH:ubiquinone oxidoreductase I                   | ArcA (-), FNR (-)            |                            |       |       |      |      |      |                          | 0.47 | 0.34  | 0.31  |      |
| <i>nuoG</i> | NADH:ubiquinone oxidoreductase I                   | ArcA (-), FNR (-)            |                            |       |       |      |      |      | 0.50                     | 0.32 | 0.26  | 0.48  |      |
| <i>nuoH</i> | NADH:ubiquinone oxidoreductase I                   | ArcA (-), FNR (-)            |                            |       |       |      |      |      |                          |      | 0.41  | 0.30  |      |
| <i>nuoI</i> | NADH:ubiquinone oxidoreductase I                   | ArcA (-), FNR (-)            |                            |       |       |      |      |      |                          |      | 0.43  | 0.32  |      |
| <i>nuoJ</i> | NADH:ubiquinone oxidoreductase I                   | ArcA (-), FNR (-)            |                            |       |       |      |      |      |                          |      | 0.47  | 0.34  |      |
| <i>nuoK</i> | NADH:ubiquinone oxidoreductase I                   | ArcA (-), FNR (-)            |                            |       |       |      |      |      |                          |      | 0.39  | 0.31  |      |
| <i>nuoL</i> | NADH:ubiquinone oxidoreductase I                   | ArcA (-), FNR (-)            |                            |       |       |      |      |      |                          |      | 0.47  | 0.35  |      |
| <i>nuoM</i> | NADH:ubiquinone oxidoreductase I                   | ArcA (-), FNR (-)            |                            |       |       |      |      |      |                          |      | 0.35  | 0.28  | 0.48 |
| <i>nuoN</i> | NADH:ubiquinone oxidoreductase I                   | ArcA (-), FNR (-)            |                            |       |       |      |      |      |                          |      |       | 0.36  |      |
| <i>ndh</i>  | NADH dehydrogenase II                              | FNR (-)                      |                            |       | 2.27  | 2.50 | 2.45 | 2.04 |                          |      |       |       |      |

**B**

| Gene               | Product/Function                                            | Relevant regulatory proteins | Fold change down-regulated |       |       |      |      |      | Fold change up-regulated |      |       |       |      |     |
|--------------------|-------------------------------------------------------------|------------------------------|----------------------------|-------|-------|------|------|------|--------------------------|------|-------|-------|------|-----|
|                    |                                                             |                              | 30+                        | 20-30 | 10-20 | 5-10 | 2-5  | 0.0  | 2-5                      | 5-10 | 10-20 | 20-30 | 30+  |     |
|                    |                                                             |                              | CORM-401 AEROBIC           |       |       |      |      |      | CORM-401 ANAEROBIC       |      |       |       |      |     |
| Time               |                                                             |                              |                            |       |       | Time |      |      |                          |      |       |       |      |     |
| 2.5                | 5.0                                                         | 10.0                         | 20.0                       | 40.0  | 80.0  | 2.5  | 5.0  | 10.0 | 20.0                     | 40.0 | 80.0  |       |      |     |
| <i>chaA</i>        | Na <sup>+</sup> : K <sup>+</sup> /H <sup>+</sup> antiporter |                              | 2.2                        | 7.0   | 14.4  | 9.8  | 5.8  | 4.1  | 2.2                      | 6.4  | 12.1  | 9.5   | 11.7 | 4.2 |
| <i>kdpA</i>        | K <sup>+</sup> transporting ATPase subunit                  | KdpE (+)                     |                            | 2.9   | 11.3  | 15.6 |      |      |                          |      |       | 2.1   | 2.3  |     |
| <i>kdpB</i>        | K <sup>+</sup> transporting ATPase subunit                  | KdpE (+)                     |                            |       | 9.8   | 13.8 | 7.5  | 4.8  |                          |      |       | 3.7   | 3.4  | 2.0 |
| <i>kdpC</i>        | K <sup>+</sup> transporting ATPase subunit                  | KdpE (+)                     | 0.4                        |       | 32.8  | 33.8 | 18.2 | 5.5  | 2.8                      |      |       |       | 4.6  | 2.8 |
| <i>kdpD</i>        | regulator of the K <sup>+</sup> transporting ATPase         |                              |                            |       |       |      | 2.1  |      |                          |      |       | 2.5   |      |     |
| <i>kdpE</i>        | regulator of the K <sup>+</sup> transporting ATPase         | KdpD-P (+)                   |                            |       |       |      | 2.7  | 2.6  | 2.0                      |      |       | 2.4   | 2.3  | 2.0 |
| <i>kdpF</i>        | K <sup>+</sup> transporting ATPase subunit                  |                              |                            | 6.2   | 20.8  | 28.0 |      | 2.0  |                          | 0.5  |       |       |      |     |
| <i>kefA (mscK)</i> | Potassium-dependent mechanosensitive channel                |                              |                            |       |       | 2.5  | 2.6  |      |                          |      |       | 2.0   |      |     |
| <i>kefB</i>        | K <sup>+</sup> : H <sup>+</sup> antiporter                  |                              |                            | 0.3   | 0.1   | 0.1  |      |      |                          |      |       |       |      |     |
| <i>kefC</i>        | K <sup>+</sup> : H <sup>+</sup> antiporter                  |                              |                            |       |       |      |      |      |                          |      |       |       |      |     |
| <i>kefF</i>        | Regulator of the Kef transporter                            |                              |                            |       |       | 0.2  |      |      |                          |      |       |       |      |     |
| <i>kefG</i>        | Protein required for KefB activity                          |                              |                            |       | 0.4   | 0.5  |      |      |                          |      |       |       |      |     |
| <i>trkA</i>        | K <sup>+</sup> transporter                                  |                              |                            | 2.3   | 2.6   |      |      |      |                          |      |       |       |      |     |
| <i>znuA</i>        | Zn <sup>2+</sup> ABC transporter                            | Zur (-)                      |                            | 2.6   | 6.5   | 11.2 | 10.0 | 5.2  |                          |      | 3.4   | 4.3   | 7.2  | 6.4 |
| <i>mscL</i>        | mechanosensitive channel                                    | RpoS (+)                     |                            |       |       | 0.4  | 0.4  |      |                          |      |       |       |      |     |
| <i>mscS</i>        | mechanosensitive channel                                    | RpoS (+)                     |                            | 2.9   | 4.7   | 3.9  |      |      |                          |      | 2.3   | 4.6   | 3.8  | 2.6 |
| <i>aqpZ</i>        | Aquaporin                                                   |                              |                            |       | 0.3   | 0.4  | 0.4  |      |                          |      |       |       |      |     |
| <i>ompC</i>        | Outer membrane porin C                                      | CpxR (-), OmpR (-)           |                            |       | 2.1   |      | 3.1  | 2.5  |                          |      |       |       |      |     |
| <i>ompF</i>        | Outer membrane porin F                                      | CpxR (-), OmpR (-)           | 0.5                        | 0.2   | 0.2   | 0.0  | 0.1  | 0.2  |                          |      | 0.2   | 0.0   | 0.0  | 0.0 |

**C**

| Gene        | Product/Function                                     | Relevant regulatory proteins | Fold change down-regulated  |       |       |       |       |       | Fold change up-regulated      |       |       |       |       |       |
|-------------|------------------------------------------------------|------------------------------|-----------------------------|-------|-------|-------|-------|-------|-------------------------------|-------|-------|-------|-------|-------|
|             |                                                      |                              | 30+                         | 20-30 | 10-20 | 5-10  | 2-5   | 0.0   | 2-5                           | 5-10  | 10-20 | 20-30 | 30+   |       |
|             |                                                      |                              | CORM-401 AEROBIC CONDITIONS |       |       |       |       |       | CORM-401 ANAEROBIC CONDITIONS |       |       |       |       |       |
| Time        |                                                      |                              |                             |       |       | Time  |       |       |                               |       |       |       |       |       |
| 2.5         | 5.0                                                  | 10.0                         | 20.0                        | 40.0  | 80.0  | 2.5   | 5.0   | 10.0  | 20.0                          | 40.0  | 80.0  |       |       |       |
| <i>baeR</i> | DNA-binding response regulator                       | CpxR (+), BaeR (+)           |                             |       | 4.2   | 5.9   | 6.6   | 4.3   |                               |       | 3.7   | 5.3   | 4.8   | 3.5   |
| <i>baeS</i> | Sensory histidine kinase                             | CpxR (+), BaeR (+)           |                             | 2.3   | 25.1  | 45.4  | 67.4  | 19.7  |                               |       | 31.0  | 38.9  | 25.2  | 14.3  |
| <i>acrD</i> | AcraD-TolC multidrug efflux system; permease subunit | CpxR (+), BaeR (+)           | 4.8                         | 10.7  | 15.2  | 11.2  | 10.9  | 6.9   |                               | 8.9   | 11.3  | 11.1  | 8.2   | 7.6   |
| <i>marA</i> | DNA-binding transcriptional dual regulator           | CpxR (+)                     | 3.0                         | 3.3   | 4.9   | 4.7   | 7.8   | 2.7   | 3.6                           | 11.4  | 16.7  | 28.6  | 47.8  | 20.4  |
| <i>marB</i> | Polypeptide: multiple antibiotic resistance protein  | CpxR (+)                     |                             | 2.2   |       | 4.4   | 6.5   |       | 3.3                           | 5.6   | 13.9  | 21.7  | 26.7  | 10.3  |
| <i>marR</i> | DNA-binding transcriptional repressor                | CpxR (+)                     |                             |       |       | 2.5   | 3.2   |       |                               | 5.1   | 8.3   | 10.9  | 20.2  | 10.8  |
| <i>mdtA</i> | Multidrug efflux system; subunit A                   | CpxR (+), BaeR (+)           | 12.4                        | 29.6  | 46.3  | 63.2  | 41.8  | 17.1  | 12.4                          | 35.2  | 63.0  | 59.9  | 60.2  | 39.3  |
| <i>mdtB</i> | Multidrug efflux system; subunit B                   | CpxR (+), BaeR (+)           | 4.4                         | 24.3  | 32.6  | 42.5  | 30.2  | 10.8  |                               | 10.4  | 24.8  | 23.0  | 20.8  | 18.4  |
| <i>mdtC</i> | Multidrug efflux system; subunit C                   | CpxR (+), BaeR (+)           |                             | 9.8   | 24.7  | 22.5  | 24.2  | 8.6   |                               | 7.9   | 22.4  | 29.8  | 21.5  | 17.0  |
| <i>mdtD</i> | Predicted transport protein                          | CpxR (+), BaeR (+)           |                             |       |       | 2.0   |       |       |                               |       | 2.6   | 2.7   | 2.4   | 2.3   |
| <i>spy</i>  | Envelope stress protein                              | CpxR (+), BaeR (+)           | 34.3                        | 124.4 | 357.1 | 330.3 | 420.8 | 250.2 | 14.3                          | 200.4 | 585.0 | 505.5 | 672.6 | 556.4 |
| <i>slt</i>  | Soluble lytic murein transglycosylase                | CpxR (+)                     |                             | 2.5   | 3.8   | 3.4   | 3.5   | 2.5   |                               | 2.5   | 3.8   | 3.4   | 3.5   | 2.5   |
| <i>degP</i> | Serine protease                                      | CpxR (+)                     |                             | 2.2   |       | 7.5   | 7.4   | 4.1   |                               | 2.0   | 18.9  | 18.5  | 23.9  | 12.0  |
| <i>cpxA</i> | Sensory histidine kinase                             | CpxR (+)                     |                             |       |       | 2.0   |       |       |                               | 2.0   | 2.9   | 2.8   | 2.1   | 2.5   |
| <i>cpxP</i> | Inhibitor of the Cpx response                        | CpxR (+)                     | 12.3                        | 17.2  | 17.7  | 13.6  | 16.8  | 10.6  | 4.6                           | 11.9  | 17.0  | 12.9  | 11.5  | 5.9   |
| <i>cpxR</i> | Transcriptional dual regulator                       | CpxR (+)                     |                             | 2.3   | 3.4   | 3.2   | 2.6   | 2.0   |                               | 3.1   | 3.4   | 3.4   | 3.3   | 3.1   |

**SUPPLEMENTARY FIG. S3. Differential expression of genes, both aerobically and anaerobically, in response to 67 μM CORM-401, involved in (A) the respiratory chains, (B) osmoregulation, and (C) general stress responses, metal ion stress, and cell envelope stress. Values within each cell are fold changes in transcript levels relative to the no-CORM condition. The heat map (above) also quantifies the changes elicited in selected genes.**

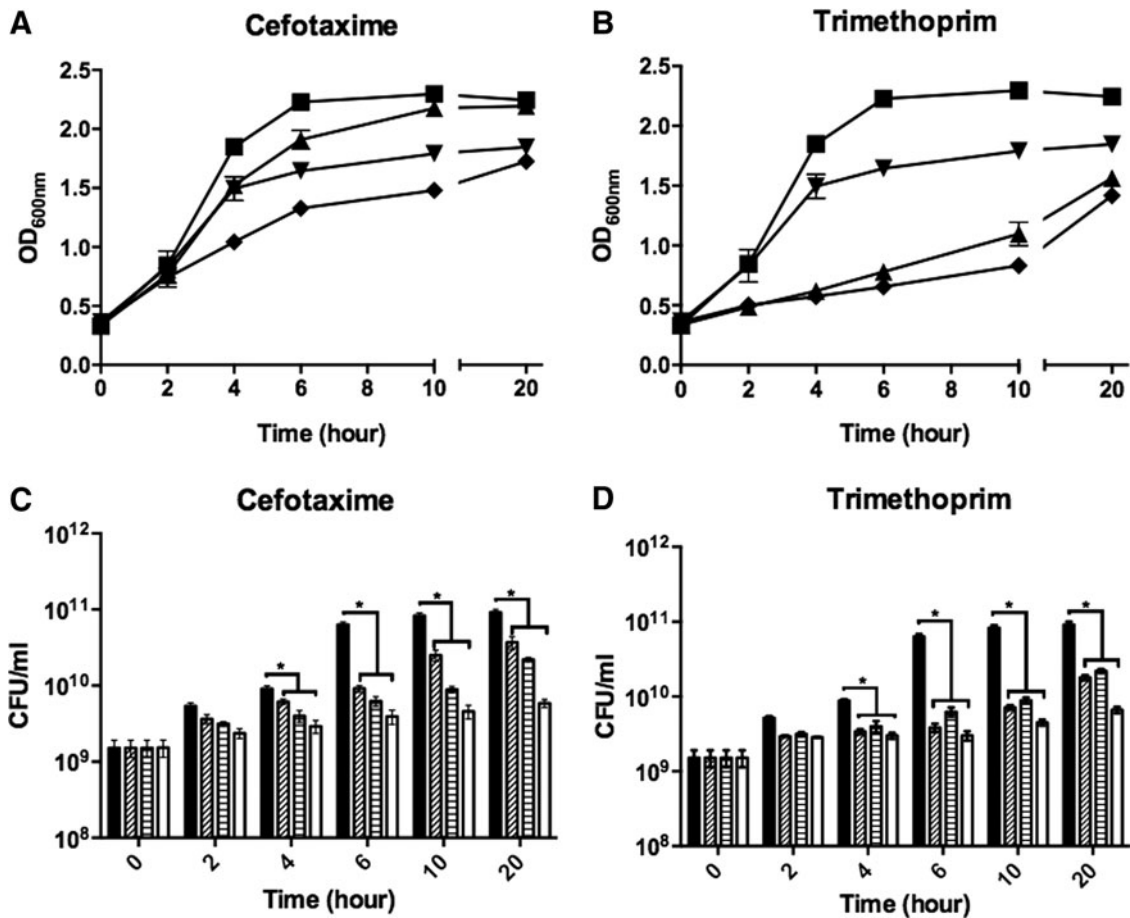

**SUPPLEMENTARY FIG. S4. CORM-401 enhances the antimicrobial effects of cefotaxime and trimethoprim with additive effects on growth and viability.** In (A) and (B), bacterial growth was followed in Evans medium with glucose until  $OD_{600nm} \sim 0.3$  was reached. CORM-401 and antibiotics were then added to the cultures; OD readings and samples for viability were taken at regular intervals. In (A) (cefotaxime) and (B) (trimethoprim), *squares* show control cultures, *triangles* are antibiotic alone ( $1 \mu\text{g ml}^{-1}$ ), *inverted triangles* are CORM-401 alone ( $100 \mu\text{M}$ ), and *diamonds* are antibiotic and CORM combined. In (C) (cefotaxime) and (D) (trimethoprim), *black columns* show control cultures, *diagonal hatched bars* are antibiotic alone ( $1 \mu\text{g ml}^{-1}$ ), *horizontally striped bars* are CORM-401 alone ( $100 \mu\text{M}$ ), and *open bars* are antibiotic and CORM combined.  $n = 3 \pm \text{SD}$ . \*,  $p < 0.05$  (T-test).
